# Supplementary material
Source: Springer Nature journal article supplement (https://www.springermedizin.de/resource/supplementary/12871_2013_210_MOESM6_ESM.pdf/9429152)

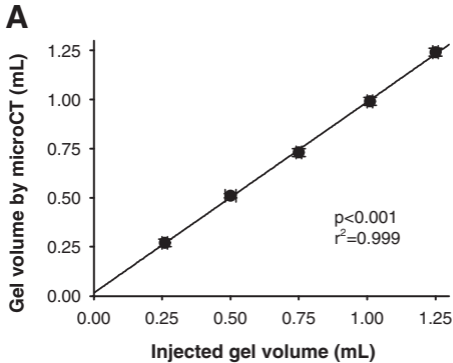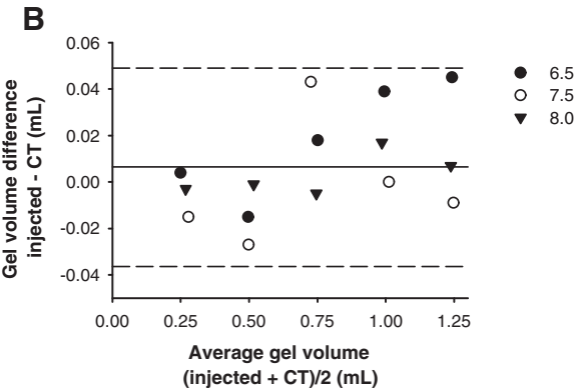

Supplement: MOESM6 [file 9429152]
